# Supplementary material
Source: PubMed Central journal article supplement (PMC3207013)

UMSCC17A  
Wildtype p53

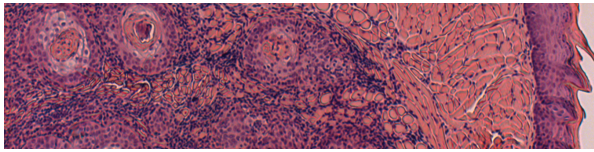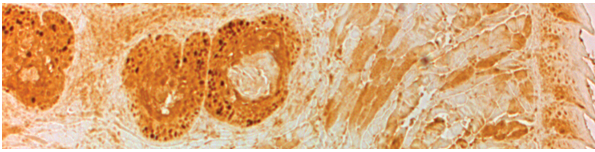

5x

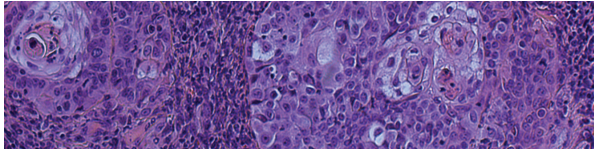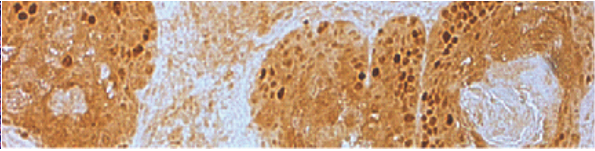

10x

MDA1586  
p53-R273L

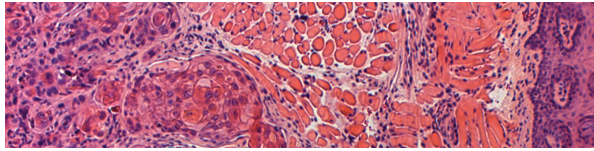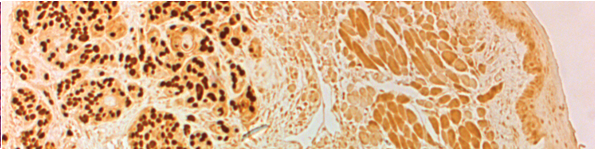

5x

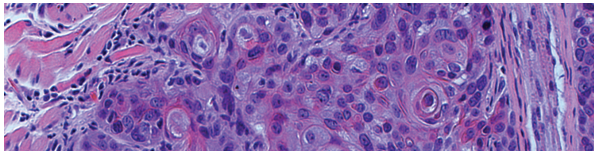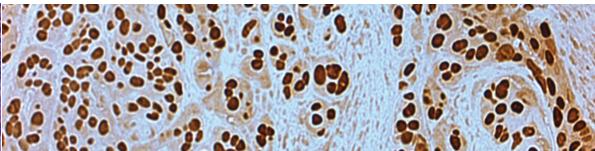

10x

UM-SCC-1  
Splice Mutation  
p53-null

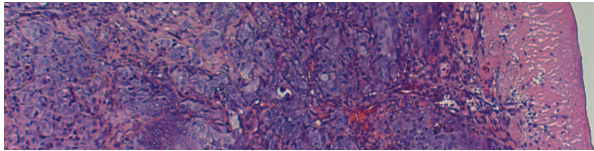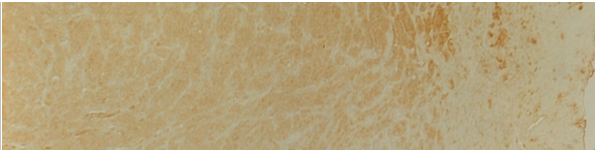

5x

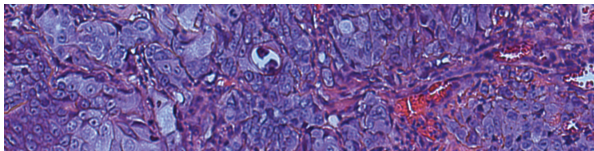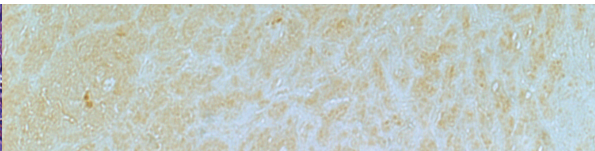

10x

Supplement: NIHMS322851-supplement-2.pdf [file NIHMS322851-supplement-2.pdf]
